# Supplementary material
Source: HighWire-hosted journal article supplement (http://molpharm.aspetjournals.org/highwire/filestream/76934/field_highwire_adjunct_files/0/Supplfig1.pdf)
Supplement: Supplfig1.pdf [file Supplfig1.pdf]

## Molecular Pharmacology

### The high affinity cAMP-specific phosphodiesterase 8B (PDE8B) controls steroidogenesis in the mouse adrenal gland

Li-Chun Lisa Tsai, Masami Shimizu-Albergine, and Joseph A. Beavo

#### Supplementary Figure 1

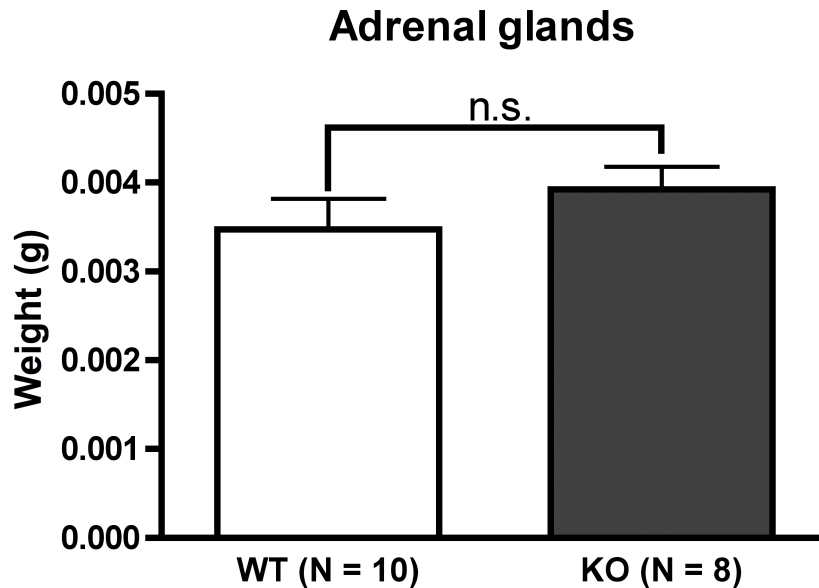

**Figure S1.** No significant increase was detected in the weight of PDE8B KO adrenal glands compared to controls. The data are reported as means  $\pm$  SEM (N = 8-10), and the data were analyzed by student's t-test (unpaired, two-tailed): no significance (n.s.).
